# Supplementary material
Source: publisher figshare collection journal article supplement (https://acs.figshare.com/ndownloader/files/5213044)
Supplement: Supplementary file 1 [file 5213044]

## Effects of Plasmonic Nanoparticle Incorporation on Electrodynamics and Photovoltaic Performance of Dye Sensitized Solar Cells

Julio Villanueva-Cab, Jose Luis Montañó-Priede, Umapada Pal

Instituto de Física, Benemérita Universidad Autónoma de Puebla, Apdo. Postal J-48, Puebla, Pue. 72570, México. E-mail: [juliovc@ifuap.buap.mx](mailto:juliovc@ifuap.buap.mx)

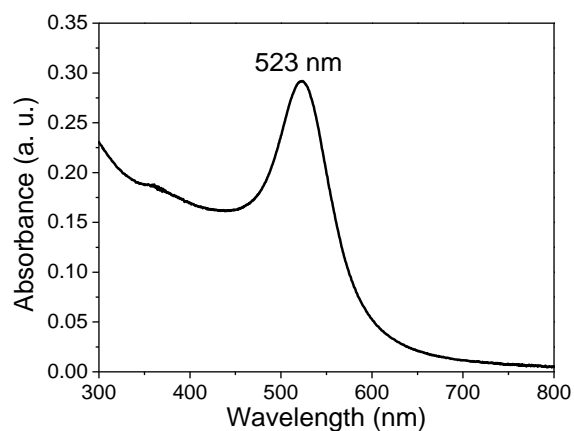

*Figure S1. Absorption spectrum of the as-synthesized gold colloid.*

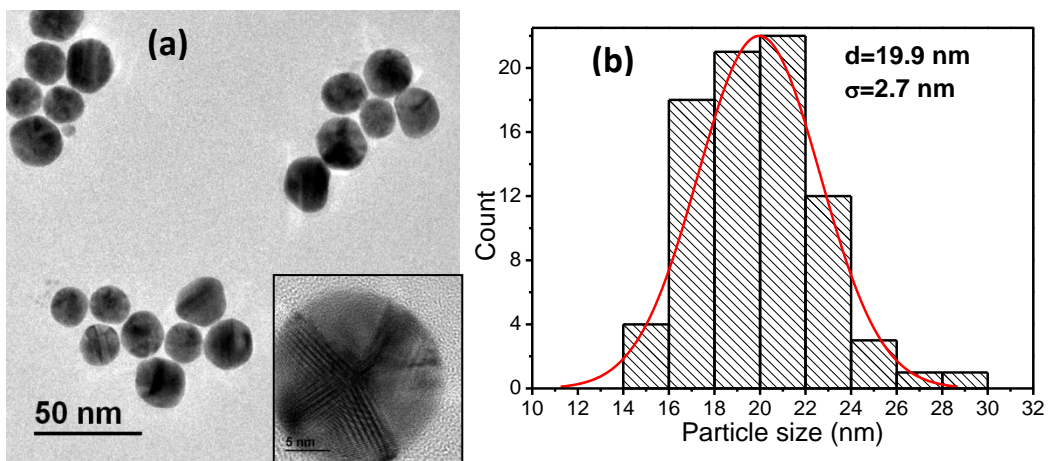

Figure S2. (a) Typical TEM micrograph of the gold nanoparticles. Inset shows the HRTEM micrograph of a representative Au nanoparticle, revealing its crystallinity and structural defects. (b) The size distribution histogram of Au nanoparticles and its Gaussian fit, revealing 19.9 nm average size and 13 % of size dispersion.

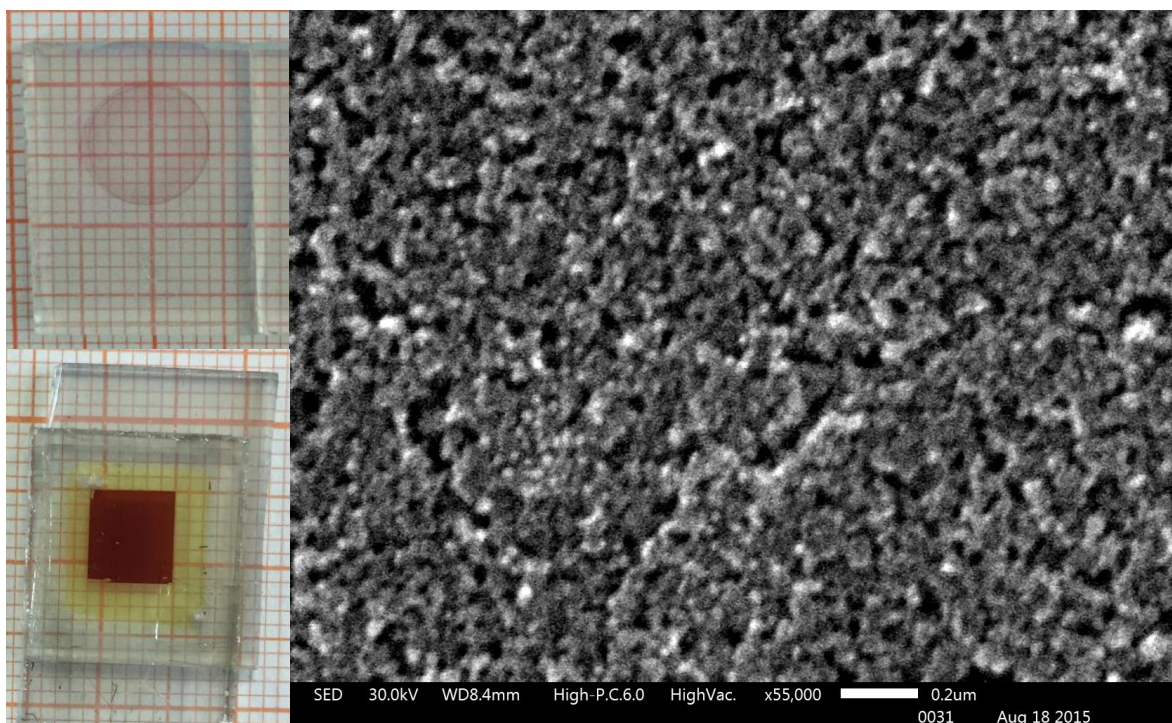

Figure S3. SEM image of the  $\text{TiO}_2$  film with 5 Au NP treatments after firing at  $350^\circ\text{C}$ .

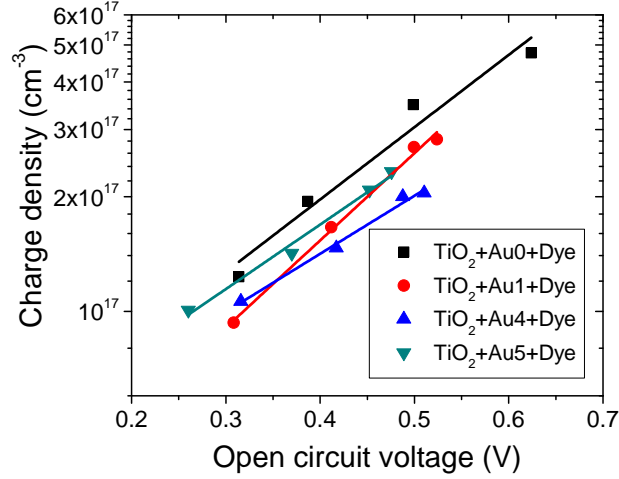

Figure S4. Electron charge density vs open circuit voltage plots as a function of light intensity for samples with different Au NP treatments.

The trap distribution parameter  $\alpha'$  was obtained by fitting the slope of the open circuit voltage ( $V_{OC}$ ) vs electron charge density ( $n$ ) plots using the relation:<sup>1</sup>

$$n = n_0 \exp[\alpha' eV / (k_B T)] \quad (s1)$$

where  $k_B$  is the Boltzmann constant,  $e$  is the absolute value of electron charge,  $T$  is the cell temperature (25 °C), and  $V$  is the cell voltage. The electron charge density in dark  $n_0$  is obtained by extrapolation of charge density to  $V_{OC}=0$ . (dark condition).

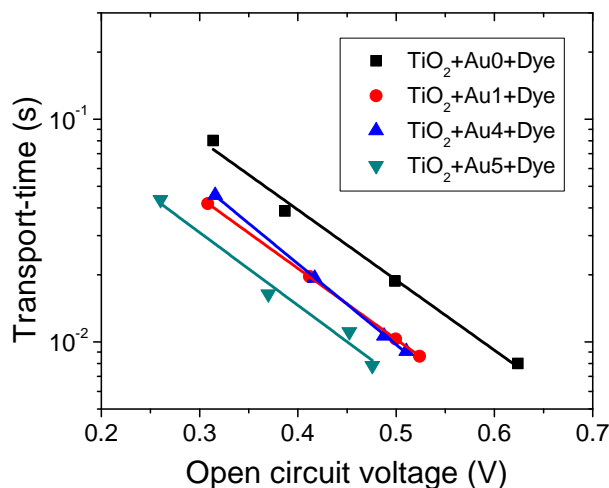

Figure S5. Electron transport-time vs open circuit voltage plots as a function of light intensity for samples with different Au NP treatments.

The non-ideality factor of free electron parameter<sup>2,3</sup>  $b$  was obtained by fitting the slope of the electron transport-time  $\tau_{tr}$  (as obtained from SLIT of photovoltage measurements) vs open circuit voltage plot using the relation:<sup>1</sup>

$$\tau_{tr} = \tau_{tr,0} \exp \left[ -\frac{(1-\alpha'b)eV}{\alpha'b(k_{\beta}T)} \right] \quad (s2)$$

and the previously determined  $\alpha'$  (Fig. S4).

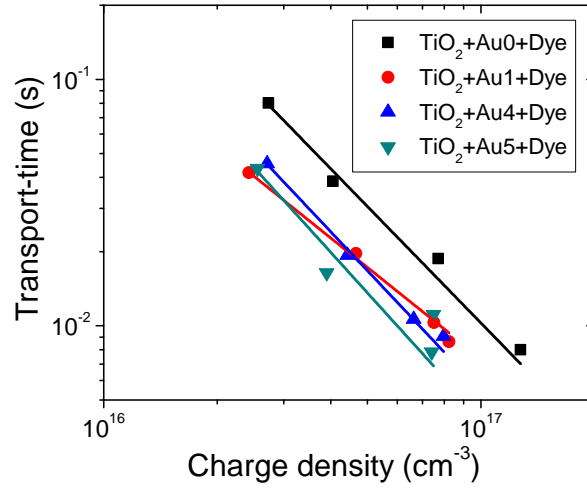

Figure S6. Electron transport-time vs charge density plots as a function of light intensity for samples with different Au NP treatments.

The transport-time in dark  $\tau_{tr,0}$  was obtained by fitting the electron transport-time  $\tau_{tr}$  vs charge density plots using the relation:<sup>1</sup>

$$\tau_{tr} = \tau_{tr,0} \left[ \frac{n}{n_0} \right]^{-\frac{1-\alpha'b}{\alpha'b}} \quad (\text{s3}),$$

and the previously estimated  $\alpha'$  and  $b$  values (Figs. S4 & S5) and extrapolating the fitted curves to  $n=n_0$  (dark conditions) for each DSSCs with different Au NP treatments obtained from Figure S4. The diffusion coefficient in dark  $D_0$  was obtained utilizing the relation:<sup>4</sup>

$$D_0 = \frac{a^2}{2.77\tau_{tr,0}} \quad (\text{s4}).$$

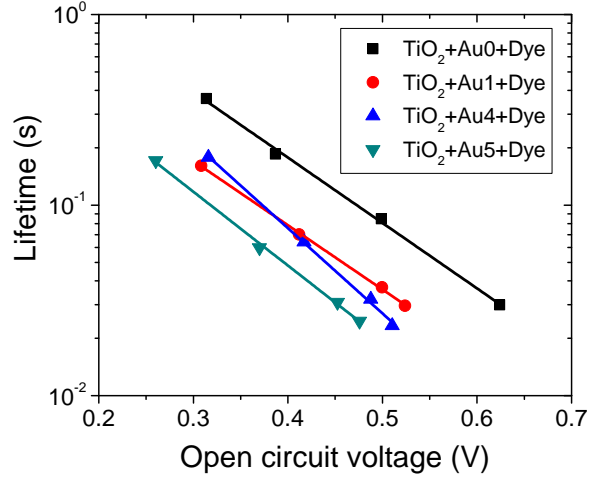

Figure S7. Electron lifetime vs open circuit voltage plots as a function of light intensity for samples with different Au NP treatments.

The nonlinear recombination parameter  $\beta$  was obtained by fitting the slope of the electron lifetime  $\tau_r$  vs open circuit voltage plots using the relations:<sup>1</sup>

$$\tau_r = \tau_{r,0} \exp \left[ -\frac{(\beta - \alpha'b)eV}{\alpha'b(k_B T)} \right] \quad (s5)$$

and the previously estimated  $\alpha'$  and  $b$  values. The electron lifetime in dark  $\tau_{r,0}$  was obtained by extrapolating the fitting curves to  $V_{OC}=0$  (dark conditions) for each DSSCs with different Au NP treatments.

The as-obtained parameters are summarized on Table S1. These parameters were used to calculate the J-V curves with the aid of total electron density model (eq. 2 of the main text), assuming a total series resistance  $R_s$  (Used to fit the experimental maximum power generated by the DSSCs). Figure S8 compares the calculated J-V curves with the corresponding experimental ones measured for DSSCs with different Au NP treatments. In Equation 2 of the main text the trap distribution parameter is defined as  $\alpha = \alpha'b$ .

Table S1. Fitting parameters obtained from SLIT of photovoltage and photocurrent measurements for the different Au treated DSSCs.

| Parameter                               | Au0                    | Au1                     | Au4                     | Au5                     |
|-----------------------------------------|------------------------|-------------------------|-------------------------|-------------------------|
| $\alpha'$                               | 0.114                  | 0.137                   | 0.091                   | 0.101                   |
| $\beta$                                 | 1.0                    | 1.0                     | 1.0                     | 1.0                     |
| $b$                                     | 3.308                  | 3.053                   | 3.242                   | 3.367                   |
| $n_0$ (m <sup>-3</sup> )                | 2.83 x10 <sup>16</sup> | 1.84 x10 <sup>16</sup>  | 2.19 x10 <sup>16</sup>  | 3.08 x10 <sup>16</sup>  |
| $D_0$ (m <sup>2</sup> s <sup>-1</sup> ) | 5.18x10 <sup>-11</sup> | 6.00 x10 <sup>-11</sup> | 6.60 x10 <sup>-11</sup> | 1.25 x10 <sup>-10</sup> |
| $k_0$ (s <sup>-1</sup> ) fit            | 0.818                  | 0.650                   | 1.523                   | 0.960                   |
| $\eta_{inj}$ fit                        | 0.596                  | 0.498                   | 0.472                   | 0.426                   |
| $d$ (μm)                                | 3.6                    | 3.6                     | 3.6                     | 3.6                     |
| $R_s$ (Ω)                               | 17.84                  | 20.25                   | 19.57                   | 14.64                   |

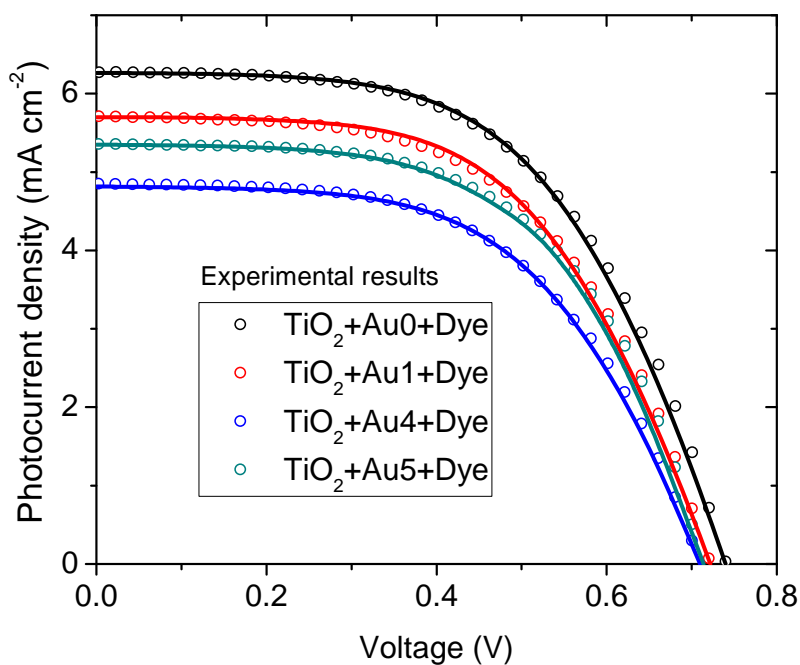

Figure S8. Comparison between the measured (symbols) and theoretical (continuous) current vs voltage curves for the DSSCs prepared with different Au NP treatments.

## References

1. Anta, J. A. et al. A Continuity Equation for the Simulation of the Current–Voltage Curve and the Time-Dependent Properties of Dye-Sensitized Solar Cells. *Phys. Chem. Chem. Phys.* **2012**, *14*, 10285-10299.
2. Jennings, J. R.; Ghicov, A.; Peter, L. M.; Schmuki, P.; Walker, A. B. Dye-Sensitized Solar Cells Based on Oriented TiO<sub>2</sub> Nanotube Arrays: Transport, Trapping, and Transfer of Electrons. *J. Am. Chem. Soc.* **2008**, *130*, 13364-13372.
3. Barnes, P. R. F.; Anderson, A. Y.; Durrant, J. R.; O'Regan, B. C. Simulation and Measurement of Complete Dye Sensitised Solar Cells: Including the Influence of Trapping, Electrolyte, Oxidised Dyes and Light Intensity on Steady State and Transient Device Behaviour. *Phys. Chem. Chem. Phys.* **2011**, *13*, 5798-5816.
4. Nakade, S.; Kanzaki, T.; Wada, Y.; Yanagida, S. Stepped Light-Induced Transient Measurements of Photocurrent and Voltage in Dye-Sensitized Solar Cells: Application for Highly Viscous Electrolyte Systems. *Langmuir* **2005**, *21*, 10803-10807.
